# Supplementary material for: Whole Genome Analysis of a Community-Associated Methicillin-Resistant Staphylococcus aureus ST59 Isolate from a Case of Human Sepsis and Severe Pneumonia in China
Source: PLoS One. 2014 Feb 20;9(2):e89235. doi: 10.1371/journal.pone.0089235 (PMC3930696; doi:10.1371/journal.pone.0089235)
Supplement: Table S1 — Comparison of gene content between the three ST59 strains. (XLS) [file pone.0089235.s002.xls]

## Sheet: Sheet1
Supplemental Table 1. Comparison of gene content between the three ST59 strains.
a. SA268 specific proteins
locus_tag	product
SA268_43	Methicillin resistance regulatory sensor-transducer MecR1
SA268_44	Type I restriction-modification system subunit R
SA268_45	Mobile element protein
SA268_46	hypothetical protein
SA268_47	hypothetical protein
SA268_48	hypothetical protein
SA268_49	Cassette chromosome recombinase B
SA268_50	Cassette chromosome recombinase A
SA268_51	hypothetical protein
SA268_52	hypothetical protein
SA268_53	hypothetical protein
SA268_54	hypothetical protein
SA268_55	Zn-dependent hydroxyacylglutathione hydrolase
SA268_56	Zn-dependent hydroxyacylglutathione hydrolase
SA268_57	hypothetical protein
SA268_58	truncated hypothetical protein
SA268_59	hypothetical protein
SA268_1763	Phage lysin
SA268_1764	Phage holin
SA268_1765	Phage protein
SA268_1766	Phage tail fiber
SA268_1767	Phage lysin
SA268_1768	Phage protein
SA268_1769	Hypothetical protein
SA268_1770	Phage protein
SA268_1771	hypothetical protein
SA268_1772	Putative major teichoic acid biosynthesis protein C
SA268_1773	Phage minor structural protein
SA268_1774	Phage protein
SA268_1775	Phage tail length tape-measure protein
SA268_1776	Phage protein
SA268_1777	Phage protein
SA268_1778	Phage protein
SA268_1779	Phage protein
SA268_1780	Phage capsid and scaffold
SA268_1781	Phage head-tail adaptor
SA268_1782	Phage capsid and scaffold
SA268_1783	hypothetical protein
SA268_1784	Phage major capsid protein
SA268_1785	phage related protein
SA268_1786	Phage tail length tape-measure protein
SA268_1787	Phage minor capsid protein
SA268_1788	Portal protein
SA268_1789	Phage terminase
SA268_1790	Phage protein
SA268_1791	Phage protein
SA268_1792	Transcriptional activator rinB
SA268_1793	Phage protein
SA268_1794	Phage protein
SA268_1795	Phage protein
SA268_1796	Dimeric dUTPase
SA268_1797	Phage protein
SA268_1798	Phage protein
SA268_1799	hypothetical protein within prophage
SA268_1800	Phage protein
SA268_1801	Phage protein
SA268_1802	Hypothetical protein
SA268_1803	Hypothetical protein
SA268_1804	Phage protein
SA268_1805	Phage protein
SA268_1806	hypothetical phage-related protein
SA268_1807	hypothetical protein
SA268_1808	Phage protein
SA268_1809	Phage replication initiation protein
SA268_1810	hypothetical protein
SA268_1811	Hypothetical protein
SA268_1812	Single-stranded DNA-binding protein
SA268_1813	ERF superfamily family
SA268_1814	hypothetical protein
SA268_1815	Hypothetical protein
SA268_1816	Phage protein
SA268_1817	Phage protein
SA268_1818	Phage protein
SA268_1819	Phage antirepressor protein
SA268_1820	hypothetical protein
SA268_1821	hypothetical protein
SA268_1822	hypothetical protein
SA268_1823	hypothetical protein
SA268_1824	CI-like repressor
SA268_1825	Phage protein
SA268_1826	Phage protein
SA268_1827	Phage integrase
SA268_2512	Mobile element protein
SA268_2513	Mobile element protein
SA268_2514	Mobile element protein
SA268_2515	RRNA (Adenine-N(6)-) -methyltransferase
SA268_2516	Aminoglycoside 3'-phosphotransferase
SA268_2517	Streptothricin acetyltransferase
SA268_2518	putative aminoglycoside 6-adenylyltansferase
SA268_2519	Ubiquinone/menaquinone biosynthesis methyltransferase UBIE
SA268_2520	hypothetical protein
SA268_2521	helix-turn-helix domain protein
SA268_2522	DNA recombinase
SA268_2523	Recombinase
SA268_2524	DNA recombinase
SA268_2525	DNA topoisomerase III
SA268_2526	Resolvase
SA268_2527	hypothetical protein
SA268_2528	Mobile element protein
SA268_2529	Replication initiation protein
SA268_2530	Integrase
SA268_2531	Predicted cell-wall-anchored protein SasK (LPXTG motif)
b. M013 specific proteins
none
c. SA957 specific proteins
none
d. genes present in SA957 and M013 but absent from SA268
locus_tag	product
SA957_0041	transposase IS431
SA957_0042	hypothetical protein
SA957_0043	hypothetical protein
SA957_0044	conserved hypothetical protein
SA957_0045	transposase
SA957_0046	putative transposase
SA957_0047	conserved hypothetical protein
SA957_0048	conserved hypothetical protein
SA957_0049	conserved hypothetical protein
SA957_0050	hypothetical protein
SA957_0051	staphylococcal casette chromosome site specific recombinase CcrC
SA957_0052	conserved hypothetical protein
SA957_0053	conserved hypothetical protein
SA957_0054	conserved hypothetical protein
SA957_0055	conserved hypothetical protein
SA957_0056	type I restriction-modification system endonuclease
SA957_0057	type I restriction-modification system, specificity subunit S
SA957_0058	type I restriction-modification system DNA methylase
SA957_0059	predicted ATP-dependent endonuclease
SA957_0060	ATP-dependent DNA helicase UvrD/PcrA, clostridial paralog 2
SA957_0061	drug transporter, putative
SA957_0062	conserved hypothetical protein
SA957_0391	staphylococcal tandem lipoprotein
SA957_0392	staphylococcal tandem lipoprotein
SA957_1082	IS1272-like transposase, degenerate
SA957_1374	putative lipoprotein
SA957_1375	putative lipoprotein
SA957_1409	phage protein
SA957_1410	hypothetical protein
SA957_1411	hypothetical protein
SA957_1412	hypothetical protein within prophage
SA957_2183	TetR family regulatory protein
SA957_2184	putative transposase
SA957_2433	predicted cell-wall-anchored protein SasK (LPXTG motif)
